# Supplementary material for: The cryo-EM structure of homotetrameric attachment glycoprotein from langya henipavirus
Source: PubMed Central journal article supplement (PMC10821904; doi:10.1038/s41467-024-45202-5), 2024-01-27
Supplement: 41467_2024_45202_MOESM1_ESM.pdf [file 41467_2024_45202_MOESM1_ESM.pdf]

1 **Supplementary Information**

2  
3 **The cryo-EM structure of homotetrameric attachment glycoprotein**  
4 **from langya henipavirus**

5 Yingying Guo<sup>1,†,\*</sup>, Songyue Wu<sup>2,3,†</sup>, Wenting Li<sup>2,3,†</sup>, Haonan Yang<sup>1,†</sup>, Tianhao Shi<sup>1</sup>, Bin  
6 Ju<sup>2,3,\*</sup>, Zheng Zhang<sup>2,3,\*</sup>, and Renhong Yan<sup>1,\*</sup>

7 <sup>1</sup>Department of Biochemistry, School of Medicine, Key University Laboratory of  
8 Metabolism and Health of Guangdong, Southern University of Science and Technology,  
9 Shenzhen 518055, Guangdong Province, China.

10 <sup>2</sup>Institute for Hepatology, National Clinical Research Center for Infectious Disease,  
11 Shenzhen Third People's Hospital, Shenzhen, China.

12 <sup>3</sup>The Second Affiliated Hospital, School of Medicine, Southern University of Science  
13 and Technology, Shenzhen, China.

14 <sup>†</sup>These authors contributed equally.

15 \*To whom correspondence should be addressed: Yingying Guo  
16 (guoyingnba@163.com); Bin Ju (jubin2013@163.com); Zheng Zhang  
17 (zhangzheng1975@aliyun.com) or Renhong Yan ([yanrh@sustech.edu.cn](mailto:yanrh@sustech.edu.cn))  
18

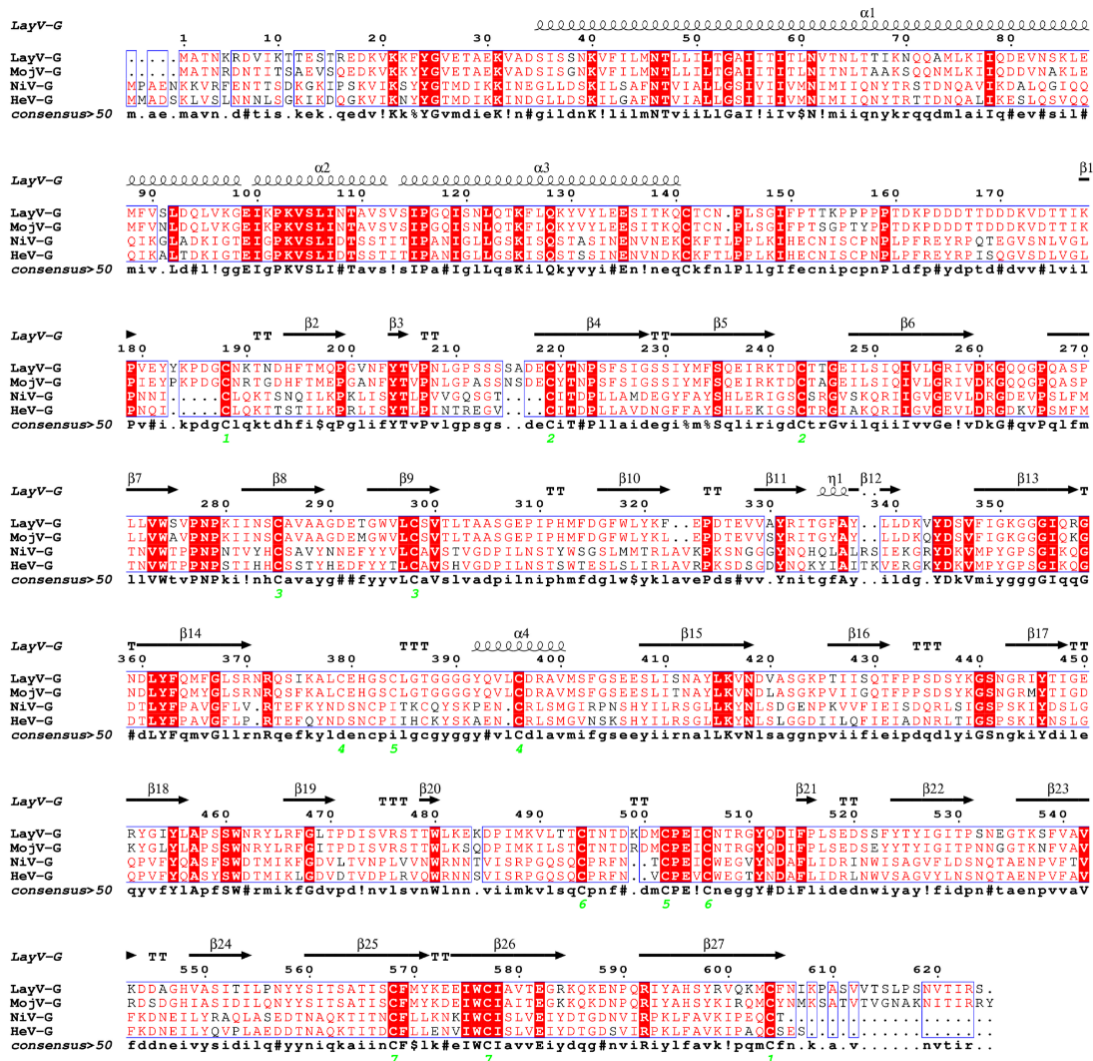

19

20

21 **Supplementary Figure 1 Sequence comparison of representative attachment**  
 22 **glycoproteins from Henipaviruses.**

23 The sequences including Langya virus (LayV-G, GenBank: UUV47206.1), Mojiang  
 24 virus (MojV-G, GenBank: YP\_009094095.1), Nipah virus (NiV-G, Genbank:  
 25 NP\_112027.1) and Hendra virus (HeV-G, GenBank: NP\_047112.2) were aligned using  
 26 MultAlin 5.4.1 and ESPrift 3.0. Cysteine residues involved in disulfide bond formation  
 27 are indicated with green numbers. The special characters for consensus symbols in the  
 28 consensus line represent different amino acids: ! is anyone of IV, \$ is anyone of LM, %  
 29 is anyone of FY and # is anyone of NDQEBZ.

30

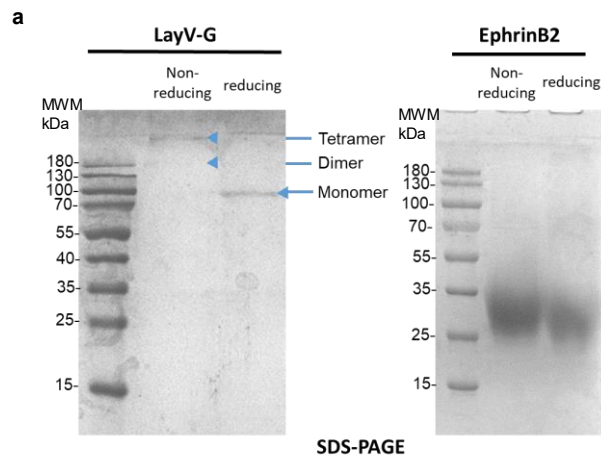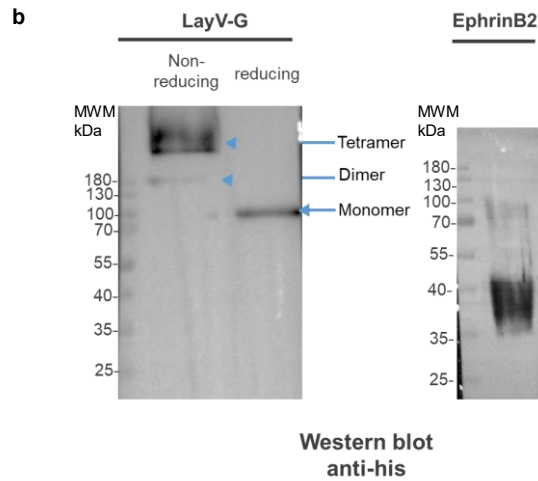

31

32 **Supplementary Figure 2 Biochemical characterization of the LayV-G and**  
 33 **ephrinB2.**

34 **a** The samples of purified LayV-G and ephrinB2 were subjected to SDS-PAGE under  
 35 non-reducing and reducing (100mM DTT) conditions to analyze the presence of  
 36 Tetramer, Dimer, and Monomer. The SDS-PAGE was performed using 12.5% SDS-  
 37 PAGE and visualized by standard Coomassie brilliant blue staining. **b** Western blot  
 38 detection performed using anti-His antibodies.

39

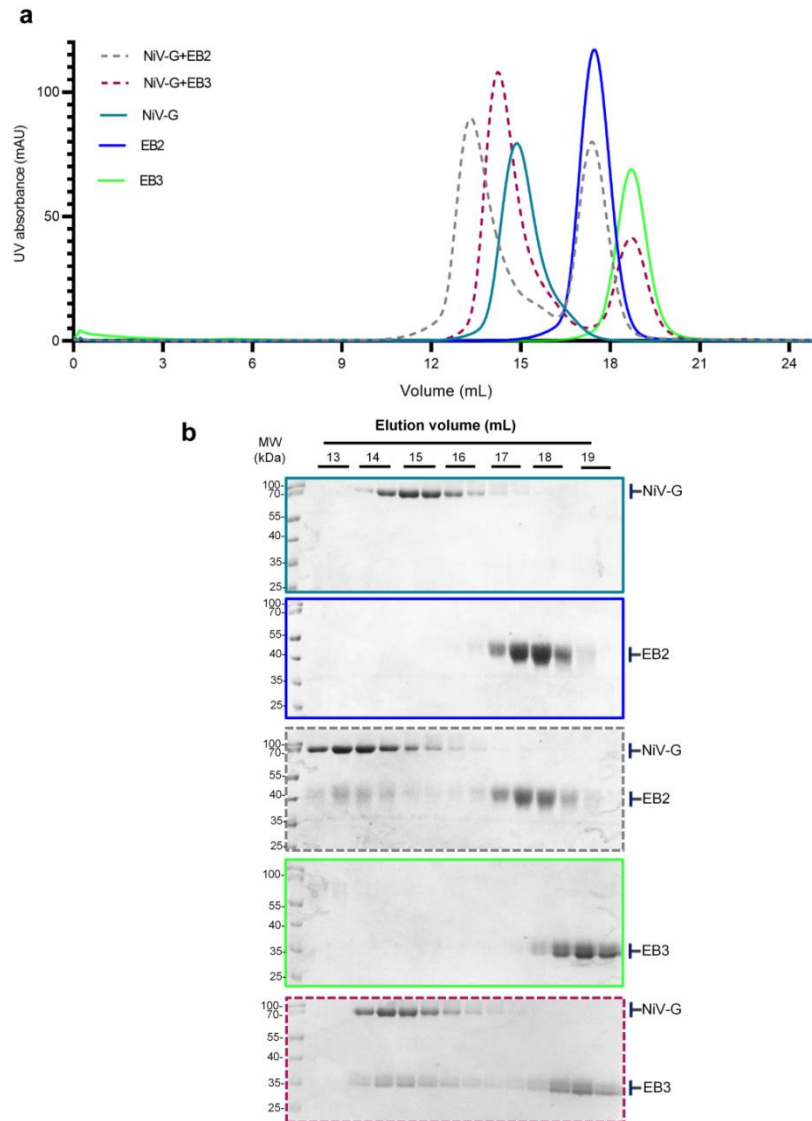

40

41

42 **Supplementary Figure 3 Biochemical characterization of the NiV-G binding to**  
 43 **ephrinB2 and ephrinB3.**

44 **a** An incubation of NiV-G and Ephrin-B2/B3, followed by passage through size-  
 45 exclusion chromatography (SEC), NiV-G incubated with Ephrin-B2 (Silver dotted line)  
 46 and Ephrin-B3 (Purple dotted line) exhibiting a shift in the peak position of the NiV-G  
 47 alone (cyan solid line). **b** The samples obtained from size-exclusion chromatography  
 48 (SEC) collected between 13 mL and 19 mL were subjected to analysis via SDS-PAGE  
 49 under reducing conditions, Showing the formation of a complex between NiV-G and  
 50 EphrinB2/B3. EB2: ephrinB2; EB3: ephrinB3. Source data are provided as a Source  
 51 Data file.

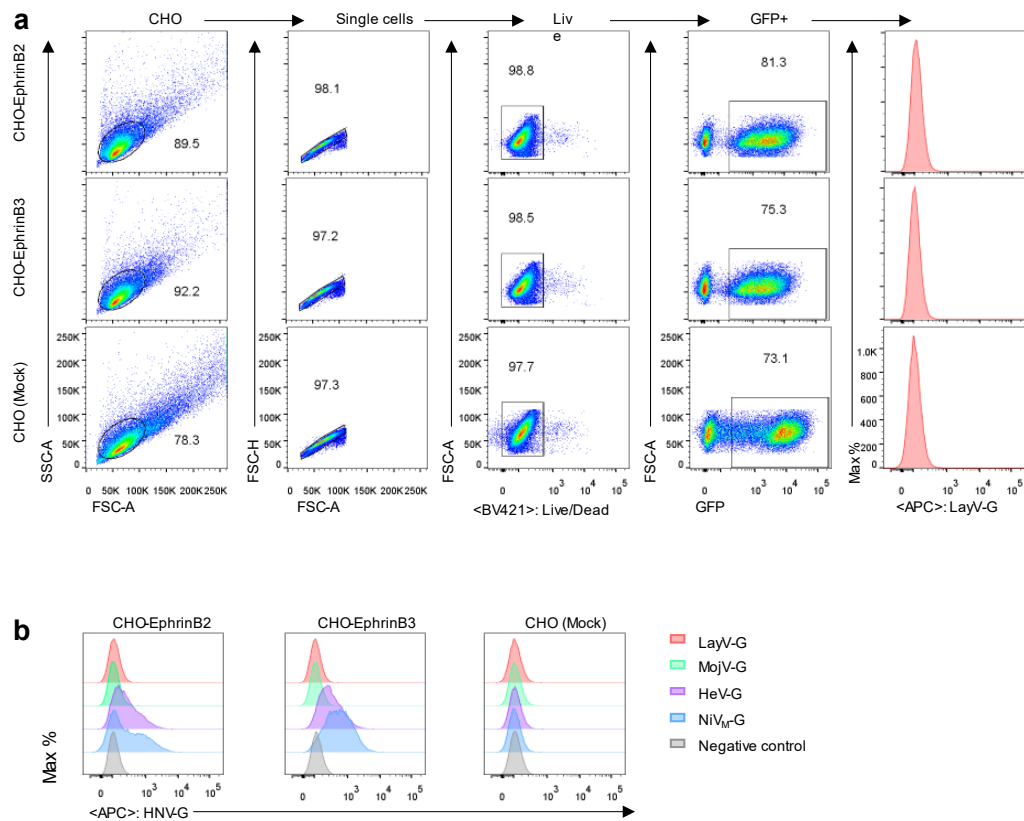

52

53 **Supplementary Figure 4 Soluble LayV-G does not bind to human ephrinB2 or**  
 54 **ephrinB3 expressed on cell surface.**

55 **a** Full-length ephrinB2, ephrinB3, and mock were separately stably transfected into  
 56 CHO cells using lentivirus with GFP as a marker to monitor gene expression. The  
 57 binding of various HNV-G–ECD-His detected by an APC conjugated mouse anti-His  
 58 monoclonal antibody against the GFP-positive cells were analyzed. **b** Fluorescence  
 59 intensity histograms show soluble HeV-G and NiV-G but not LayV-G or MojV-G  
 60 ectodomain with His-tag were able to bind to cell surface ephrinB2 or ephrinB3. No  
 61 HNV-G protein was added into the incubation in the negative control group. One  
 62 representative data analysis of two independent experiments is presented here. The  
 63 mock was stably transfected with empty lentivector with GFP marker. Source data are  
 64 provided as a Source Data file.

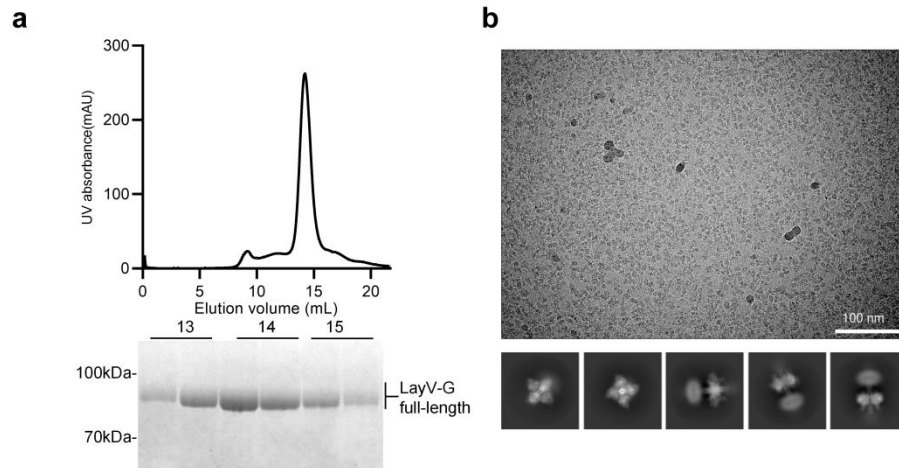

65

66

67 **Supplementary Figure 5 Cryo-EM sample purification, micrograph and**  
68 **representative 2D classification.**

69 **a** The last purification step by size exclusion chromatography (SEC) in the presence of  
70 GDN. Source data are provided as a Source Data file. **b** A representative micrograph  
71 and 2D class average images are displayed.

72

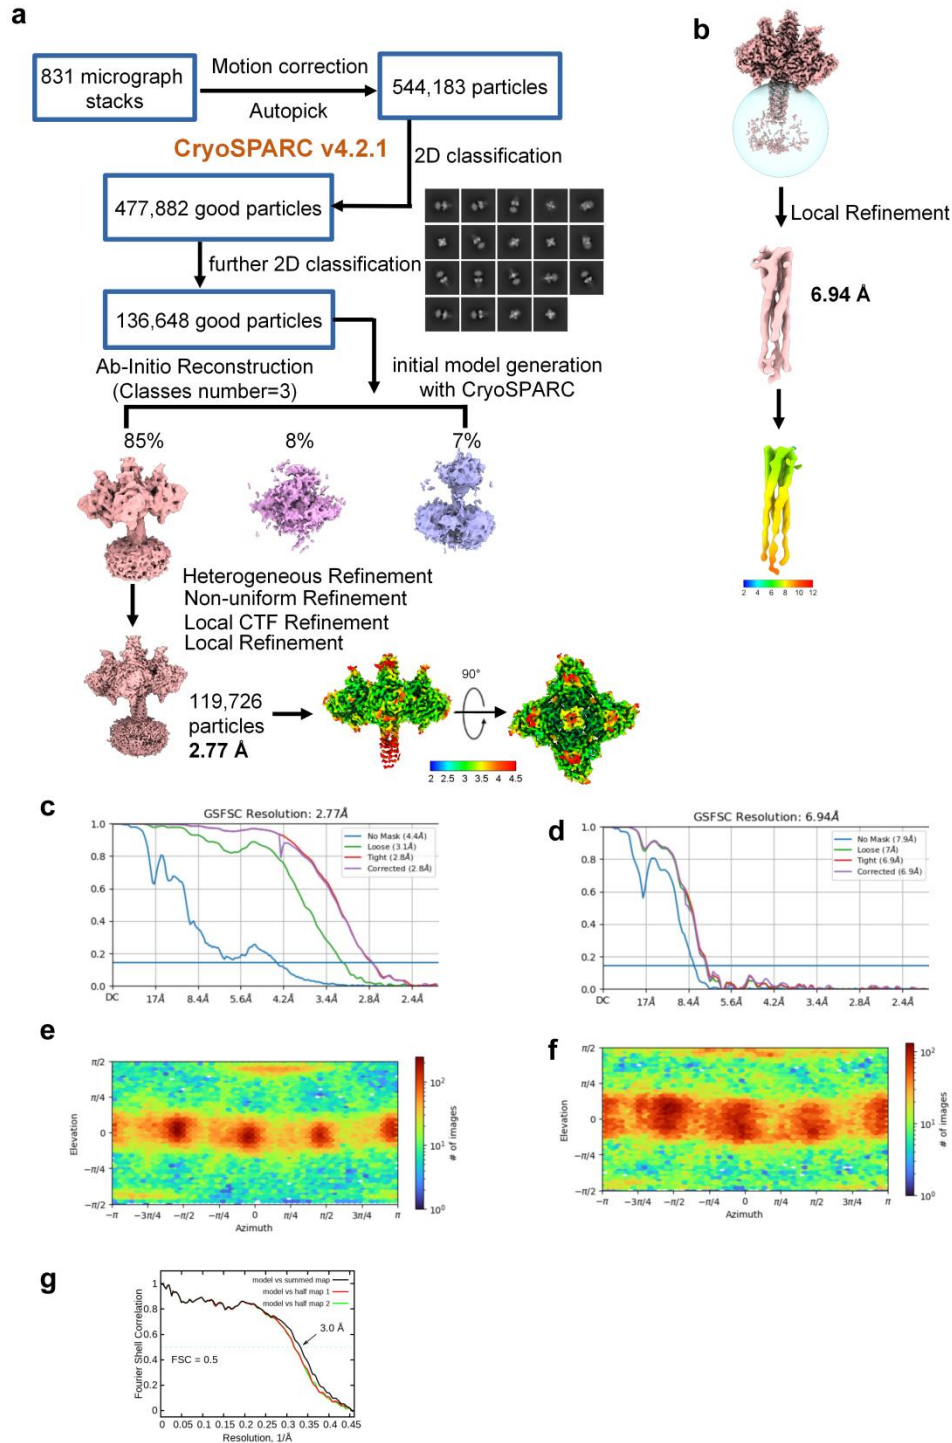

73

74 **Supplementary Figure 6 Cryo-EM data processing and analysis of LayV-G.**

75 **a** CryoEM data processing flow chart computed using cryoSPARC 3.3.1 and  
 76 Estimation of local resolution of the final cryo-EM map. **b** Local refinement of TM  
 77 domain results. **c,d** The final whole map had GSFSC 0.143 resolution of 2.77 Å, and  
 78 TM domain local refinement map had GSFSC 0.143 resolution of 6.94 Å. **e,f** Angular  
 79 distribution of the LayV-G particles in the final round of 3D refinement using

80 cryoSPARC 3.3.1. **g** Model-map FSC plots calculated by Phenix 1.11.1 between  
81 refined map and the atomic model.  
82



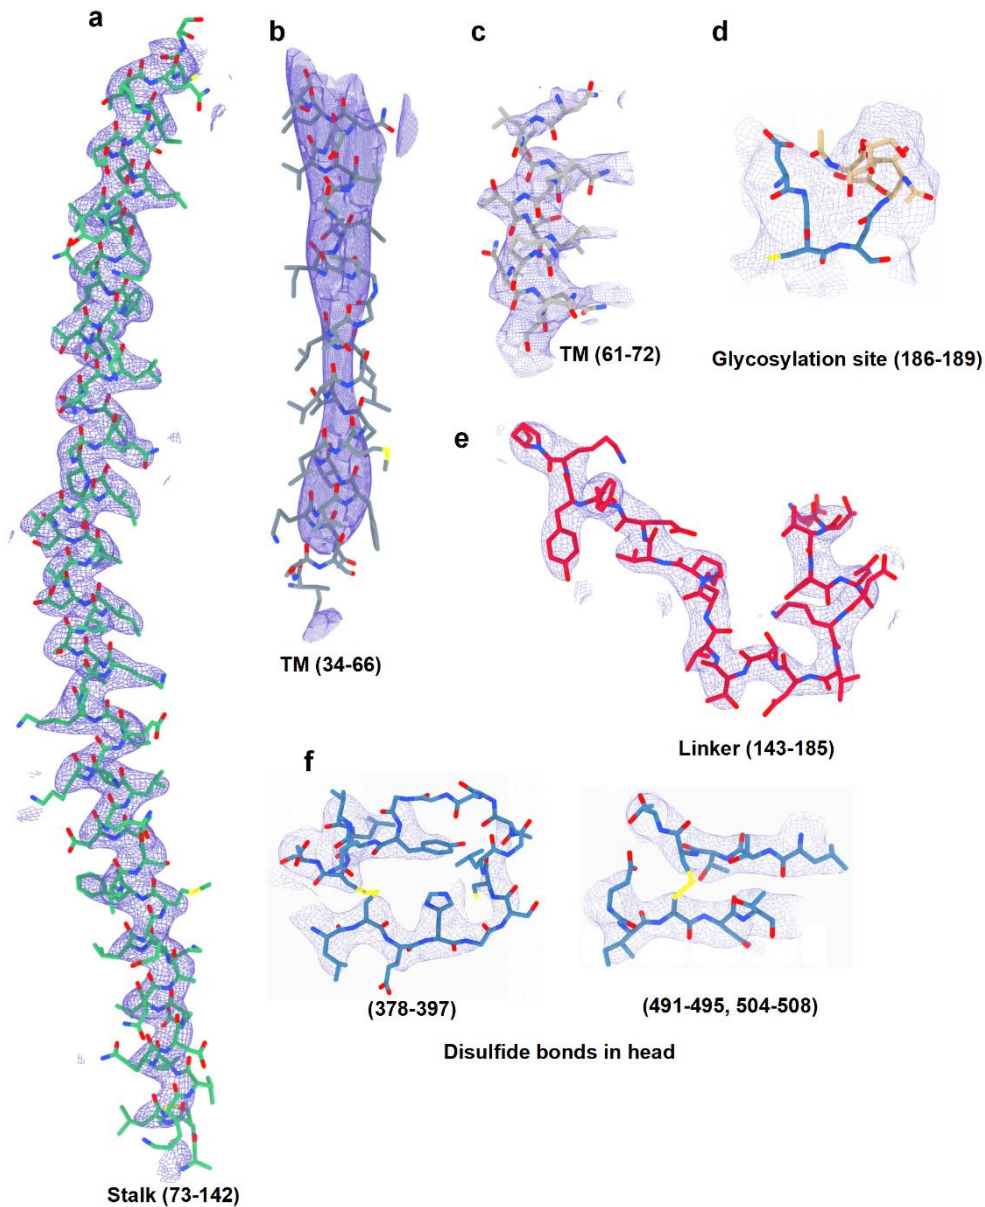

83

84 **Supplementary Figure 7 Representative cryo-EM density maps of LayV-G.**

85 **a** Cryo-EM density maps for stalk are shown at threshold of  $6 \sigma$ . **b** Cryo-EM density  
 86 map of local refinement TM domain is shown at threshold of  $5 \sigma$ . **c** Cryo-EM density  
 87 map of partial TM domain of whole map is shown at threshold of  $5 \sigma$ . **d** Cryo-EM  
 88 density maps of glycosylation site is shown at threshold of  $7 \sigma$ . **e** Cryo-EM density  
 89 maps of linker is shown at threshold of  $6 \sigma$ . **f** Cryo-EM density maps of two typical  
 90 disulfide bonds are shown at threshold of  $7 \sigma$ .

91

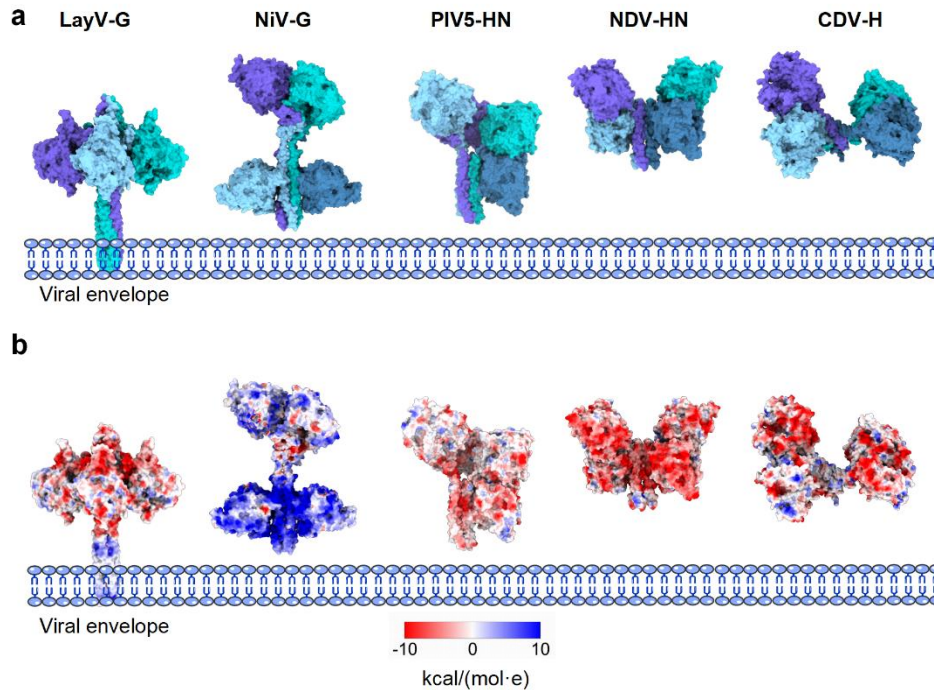

92

93 **Supplementary Figure 8 Comparative structural gallery of available**  
 94 **paramyxovirus attachment glycoprotein architectures.**

95 Five structures including LayV-G, NiV-G (PDB ID: 7TY0 and 7TXZ), PIV5-HN (PDB  
 96 ID: 4JF7), NDV-HN (PDB ID: 3T1E) and CDV-H (PDB ID: 7ZNY) are near vertical  
 97 inserted into viral membrane. **a** Structure surfaces are colored by chains according to  
 98 LayV-G. **b** Structure surfaces are colored by electrostatic potentials, which were  
 99 estimated in ChimeraX 1.6.1 using coulombic calculation method with default coloring  
 100 ranging from red for negative potential through white to blue for positive potential.  
 101 Abbreviations: NiV (Nipah virus), PIV5 (parainfluenza virus 5), NDV (Newcastle  
 102 disease virus) and CDV (canine distemper virus).

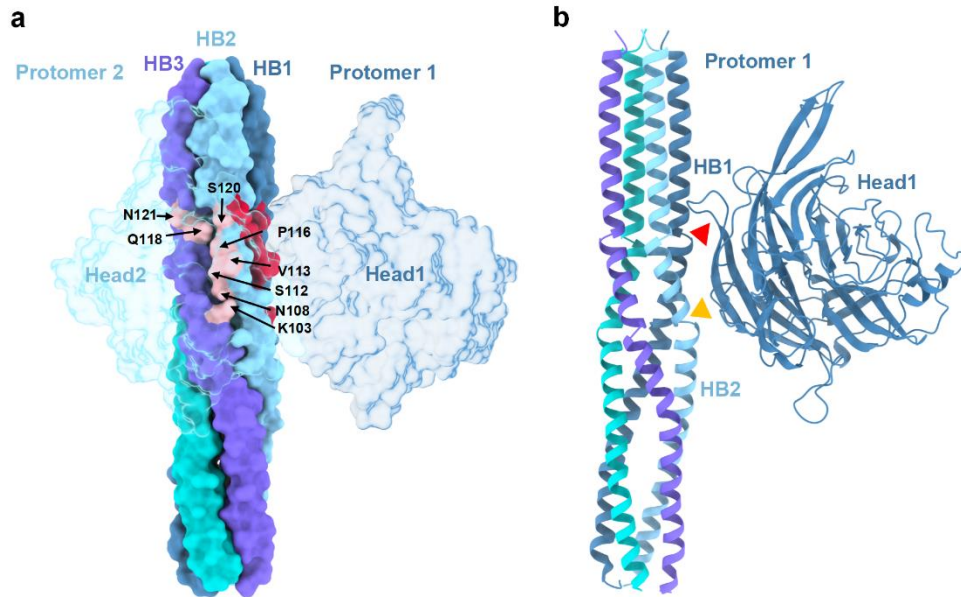

103

104

105 **Supplementary Figure 9 The interaction between head and 4HB of LayV-G cause**  
 106 **the helices of stalk bend and twist.**

107 **a** Each head contact with two adjacent 4HB subunits. The head1 interact with the red  
 108 area from HB1 and HB2, and the head2 interact with the pink area from HB2 and HB3.

109 **b** Head1 binding cause two places (yellow triangle and red triangle) of HB1 and HB2  
 110 bend and twist, respectively.

111

112

113  
114  
115  
116

**Supplementary Table S1. Cryo-EM data collection, refinement, and validation statistics**

---

|                                           |                                        |
|-------------------------------------------|----------------------------------------|
| <b>Data collection</b>                    |                                        |
| EM equipment                              | Titan Krios (Thermo Fisher Scientific) |
| Voltage (kV)                              | 300                                    |
| Detector                                  | Gatan K3 Summit                        |
| Energy filter                             | Gatan GIF Quantum, 20 eV slit          |
| Pixel size (Å)                            | 1.095                                  |
| Electron dose (e-/Å <sup>2</sup> )        | 50                                     |
| Defocus range (µm)                        | -1.4 ~ -1.8                            |
| Sample                                    | LayV-G                                 |
| Number of collected micrographs           | 831                                    |
| <b>3D Reconstruction</b>                  |                                        |
| Software                                  | cryoSPARC 3.3.1                        |
| Number of used particles (Overall)        | 119,726                                |
| Resolution (Å)                            | 2.77                                   |
| Symmetry                                  | C1                                     |
| Map sharpening B-factor (Å <sup>2</sup> ) | -98.6                                  |
| <b>Refinement</b>                         |                                        |
| Software                                  | Phenix 1.11.1                          |
| Cell dimensions                           |                                        |
| a=b=c (Å)                                 | 280.3                                  |
| α=β=γ (°)                                 | 90                                     |
| Model composition                         |                                        |
| Protein residues                          | 526                                    |
| Side chains assigned                      | 526                                    |
| Na                                        | 6                                      |
| Zn                                        | 1                                      |
| Sugar                                     | 4                                      |
| R.m.s deviations                          |                                        |
| Bonds length (Å)                          | 0.022                                  |
| Bonds Angle (°)                           | 1.266                                  |
| Ramachandran plot statistics (%)          |                                        |
| Preferred                                 | 95.82                                  |
| Allowed                                   | 3.99                                   |
| Outlier                                   | 0.19                                   |
| <b>Data availability</b>                  |                                        |
| PDB code                                  | 8JZB                                   |
| EMDB code                                 | EMD-36741                              |

---

Original gel image

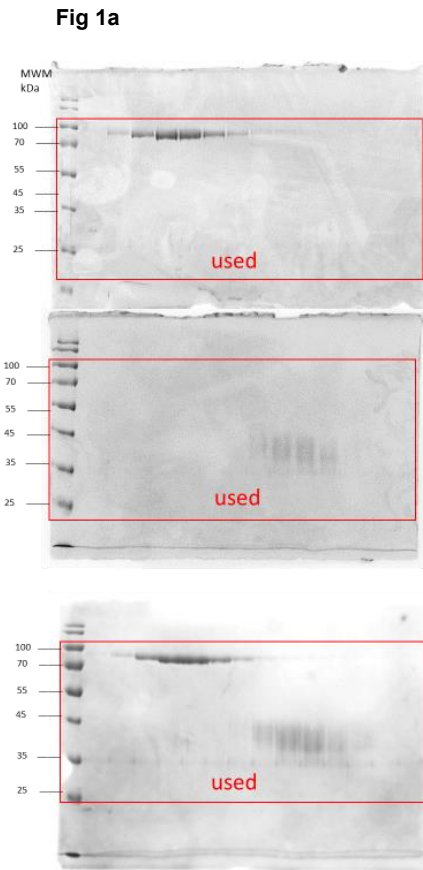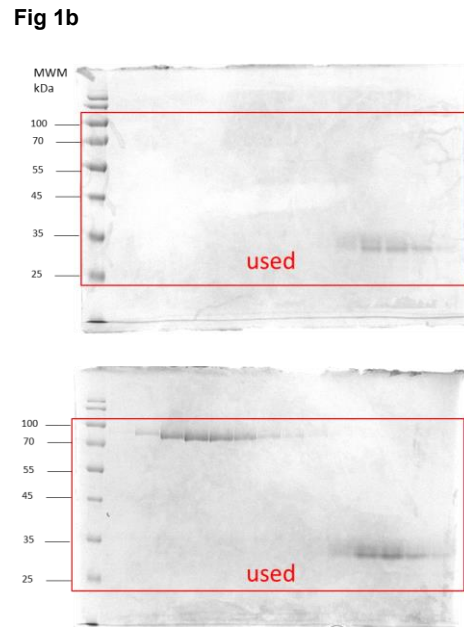

\*These gels are shown in Figure 1

Original gel image

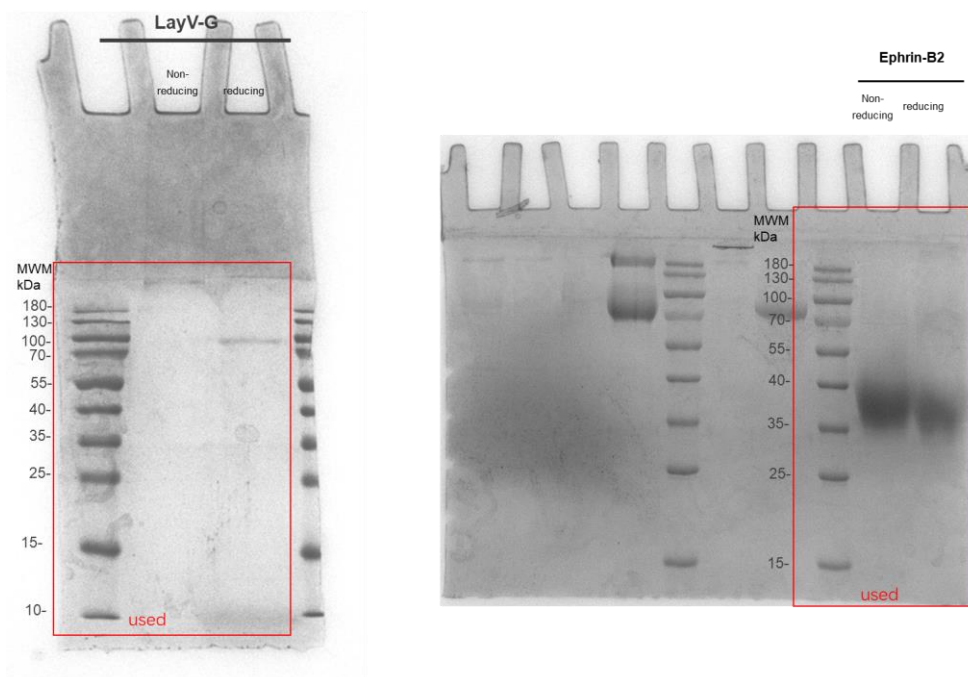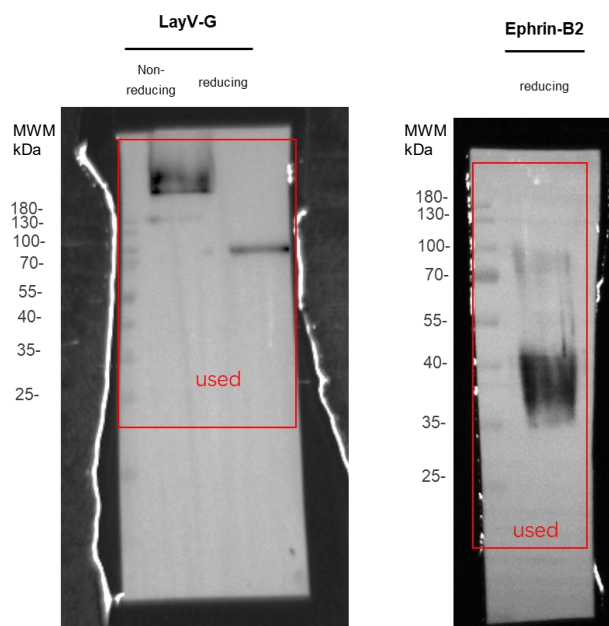

## Original gel image

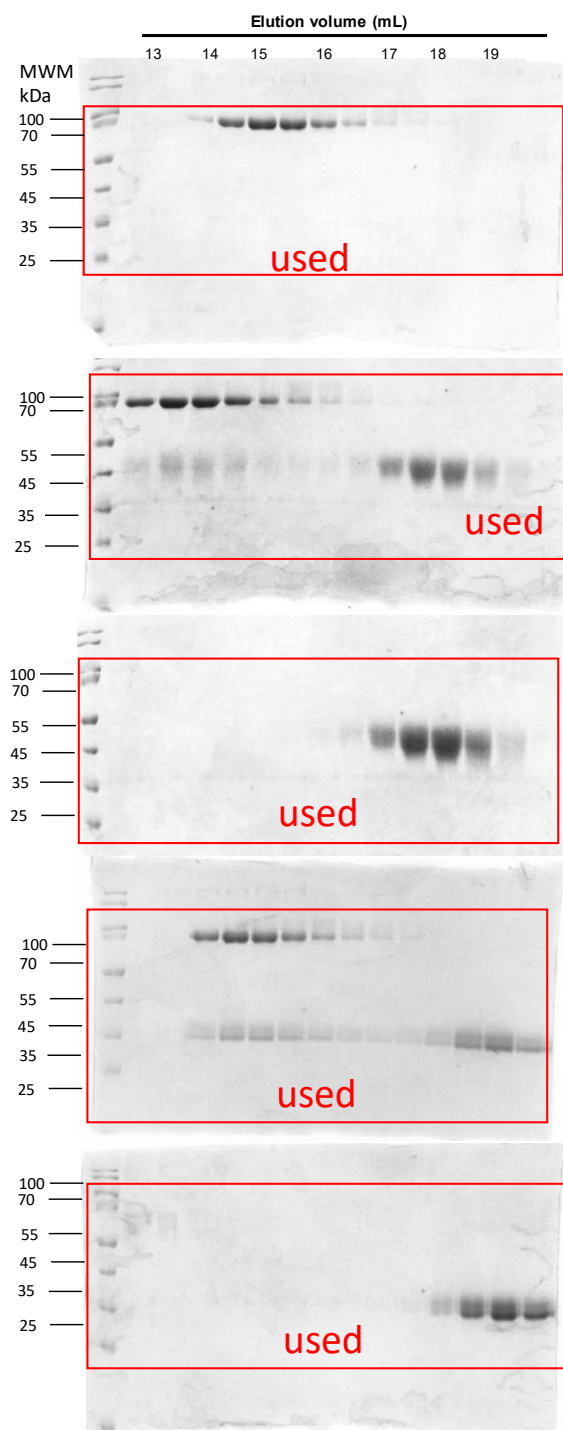

\*Theses gels are shown in Supplementary Fig. 3

Original gel image

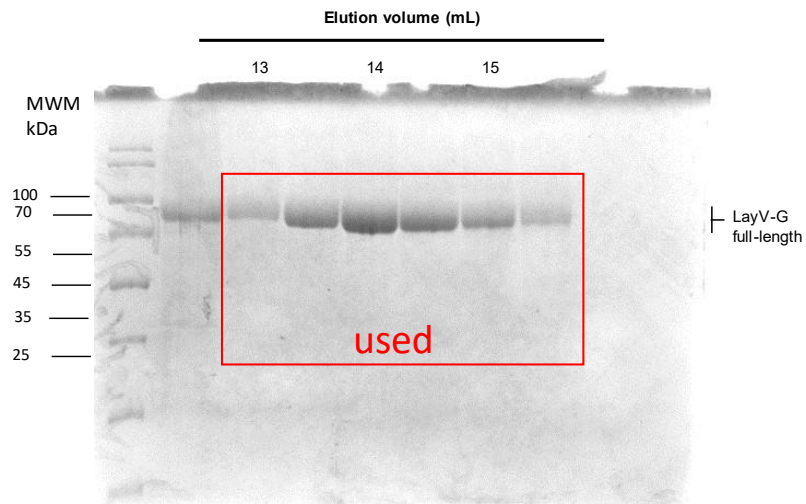

**\*This gel is shown in Supplementary Fig. 5**

122  
123
